# Supplementary material
Source: MDPI journal article supplement (https://www.mdpi.com/1424-8247/15/1/62)
Supplement: s1 [file s1]

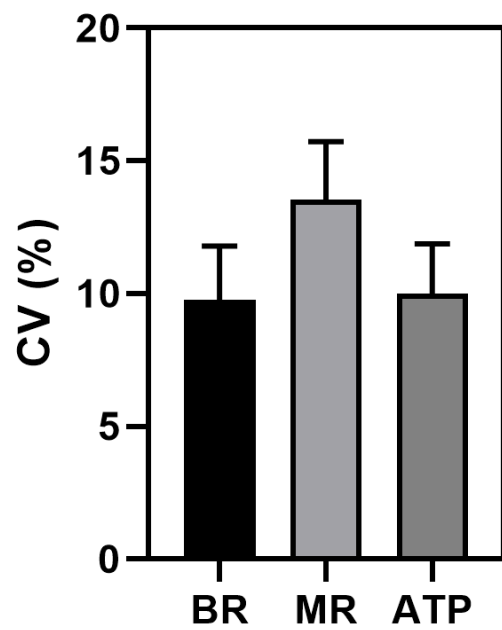

**Figure S1.** *Determining the degree of concordance between iPSC-RPE lines generated from the same donor.* To compare multiple lines from the same donor (n=15 total donors), coefficient of variance ( $CV = (\text{stdev}/\text{mean}) \times 100$ ) was calculated from the results of mt parameters measured in the CMST assay. Bar graphs are mean  $\pm$  SEM.

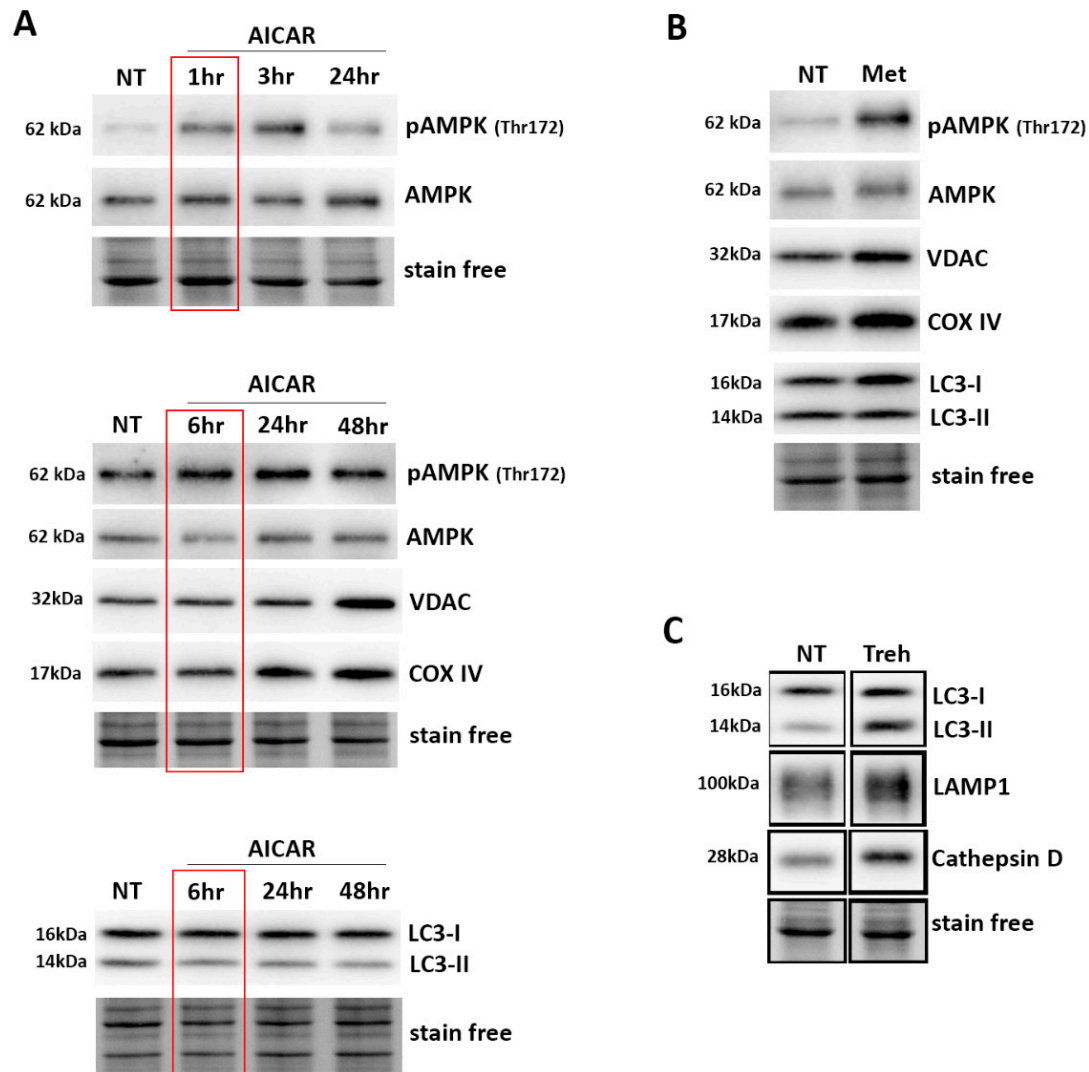

**Figure S2.** Representative Western blot images from data shown in Figure 4. Images of Western blots used to analyze protein content after AICAR (A), Metformin (Met) (B), or Trehalose (Treh) (C) treatment. NT = no treatment. Molecular mass for each protein is shown on the left. Stain free image below blot was used to normalize protein load. In Panel A, bands within the red rectangles were not used in this study.

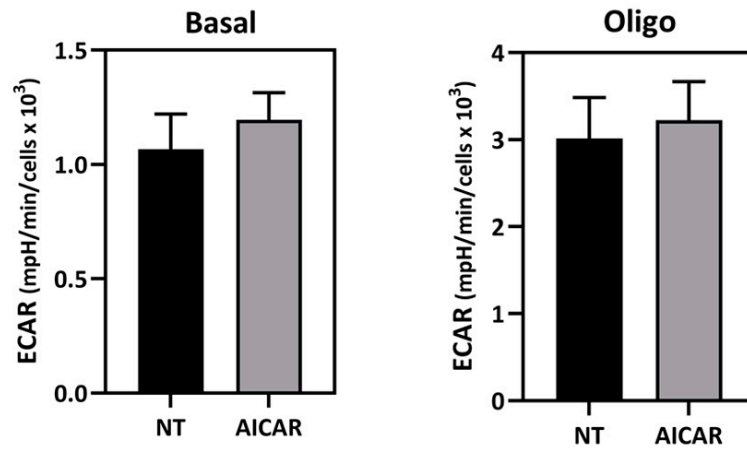

**Figure S3.** *AICAR does not cause a shift in metabolism.* AMD iPSC-RPE (n=4) were plated in a 96 well plate, incubated overnight and treated with AICAR for 48hr. After performing a CMST assay, ECAR values were compared between no treatment and AICAR treatment. Bar graphs are mean  $\pm$  SEM.

**Table S1.** AMD donor iPSC-RPE lines demographics.

| <b>iPSC-RPE line</b> | <b>Age<sup>a</sup>/Gender<sup>b</sup></b> | <b>CFH<sup>c</sup>/ARMS2<sup>d</sup><br/>genotype</b> | <b>Figures using data<br/>from specific line</b> |
|----------------------|-------------------------------------------|-------------------------------------------------------|--------------------------------------------------|
| AMD donor 1 – 1B1    | 79/M                                      | CT/TT                                                 | 4C,G                                             |
| AMD donor 2 – 1A6    | 84/F                                      | TT/TT                                                 | 4B,E,F                                           |
| AMD donor 3 – 1C1    | 80/F                                      | CT/GT                                                 | 4B-H                                             |
| AMD donor 4 – 3      | 83/F                                      | TT/GT                                                 | 4B,E                                             |
| AMD donor 5 – 3      | 75/F                                      | CC/GT                                                 | 4C                                               |
| AMD donor 6 – 1      | 75/F                                      | CC/GT                                                 | 4C,D,F,G                                         |
| AMD donor 7 – C      | 64/F                                      | CT/GT                                                 | 4C                                               |
| AMD donor 8 – 2      | 66/M                                      | CT/TT                                                 | 4B,E,F                                           |
| AMD donor 9 – 3      | 70/F                                      | CC/GG                                                 | 4F,G                                             |
| AMD donor 10 – C     | 80/F                                      | TT/GT                                                 | 4C                                               |

<sup>a</sup> Age of donor, in years, from whose conjunctival cells were used to generate iPSC-RPE.

<sup>b</sup> Gender of donor. F = female, M = male.

<sup>c</sup> Complement Factor H (CFH) genotype for rs106117; low risk = TT, high risk = CT and CC.

<sup>d</sup> Age-related maculopathy susceptibility 2 (ARMS2) for rs10490924; low risk = GG, high risk = GT and TT.

**Table S2. Antibodies used in this study**

| <b>Antigen</b> | <b>Host</b> | <b>Company</b>    | <b>Product</b> | <b>Dilution</b> | <b>Application</b> |
|----------------|-------------|-------------------|----------------|-----------------|--------------------|
| RPE65          | Mouse       | Novus             | NB100-355      | 1:1000          | WB                 |
| CRALBP         | Mouse       | Novus             | NB100-73492    | 1:1000          | WB                 |
| Na,K ATPase    | Rabbit      | Cell Signaling    | 3010           | 1:1000          | WB                 |
| Ezrin          | Rabbit      | Cell Signaling    | 3145           | 1:1000          | WB                 |
| Keratin 18     | Mouse       | Cell Signaling    | 4548           | 1:1000          | WB                 |
| ZO-1           | Rabbit      | Thermo Scientific | 617300         | 1:50            | IF                 |
| Bestrophin     | Mouse       | Novus             | NB300-164      | 1:50            | IF                 |
| pAMPK (Thr172) | Rabbit      | Cell Signaling    | 2535           | 1:1000          | WB                 |
| AMPK           | Rabbit      | Cell Signaling    | 2532           | 1:1000          | WB                 |
| VDAC           | Rabbit      | Cell Signaling    | 4866           | 1:1000          | WB                 |
| COX IV         | Mouse       | Cell Signaling    | 11967          | 1:1000          | WB                 |
| LC3            | Rabbit      | Cell Signaling    | 4108           | 1:1000          | WB                 |
| LAMP1          | Rabbit      | Cell Signaling    | 9091           | 1:1000          | WB                 |
| Cathepsin D    | Rabbit      | Cell Signaling    | 2284           | 1:1000          | WB                 |
